# Supplementary material for: Genome mining for natural product biosynthetic gene clusters in the Subsection V cyanobacteria
Source: PubMed Central journal article supplement (PMC4558948; doi:10.1186/s12864-015-1855-z), 2015-09-03
Supplement: 12864_2015_1855_MOESM4_ESM.pdf [file 12864_2015_1855_MOESM4_ESM.pdf]

**Additional file 4: Complete orphan NRPS/PKS gene clusters identified from the Subsection V cyanobacterial genomes.**

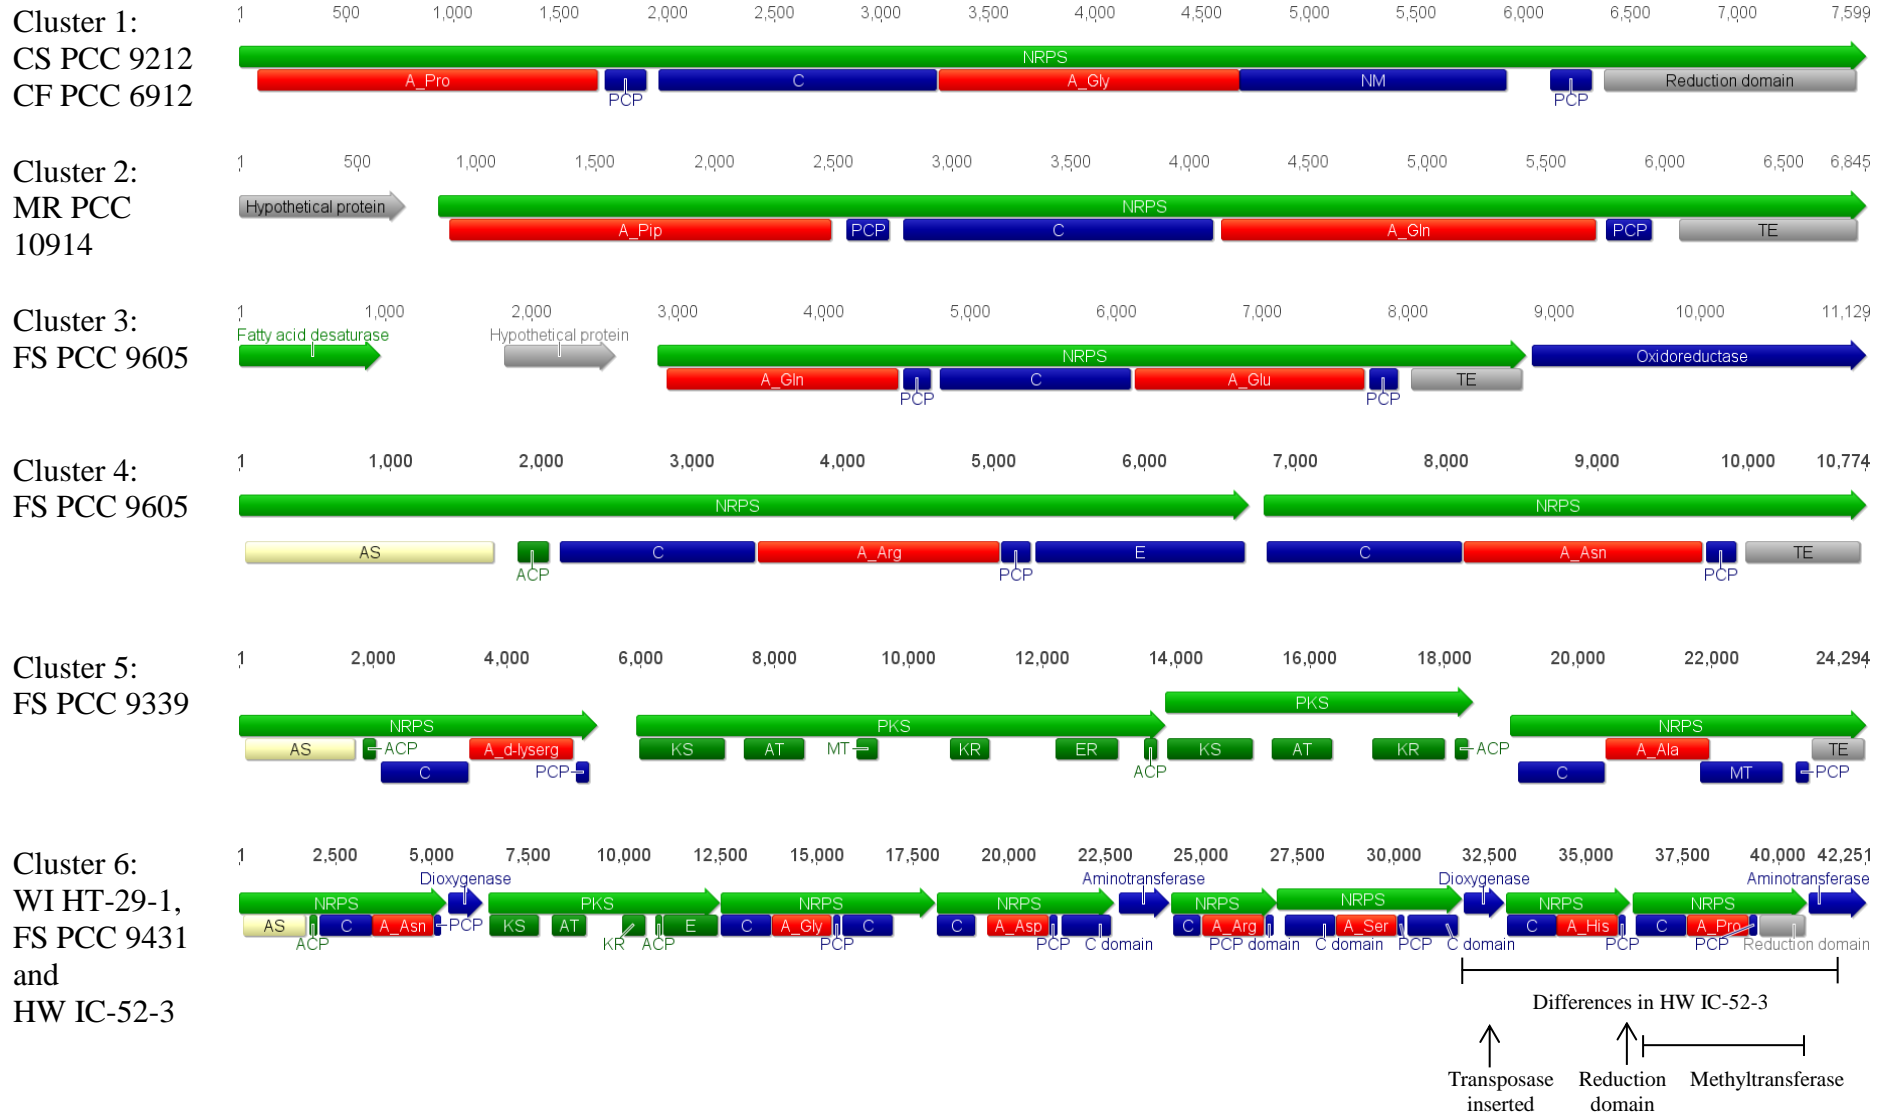

Cluster 7:  
MR  
PCC10914

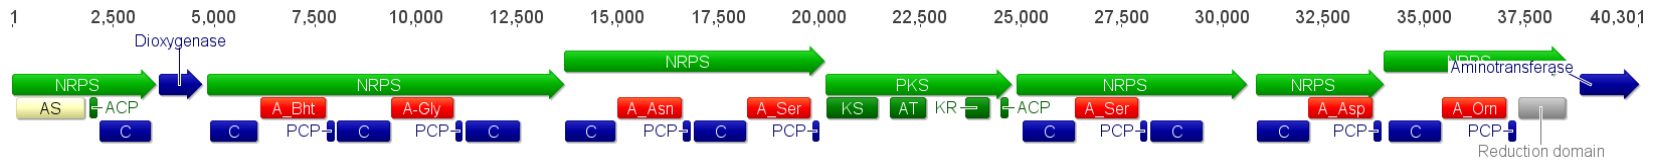

Cluster 8:  
CF PCC 6912,  
CS PCC 9212  
and MT  
BC008

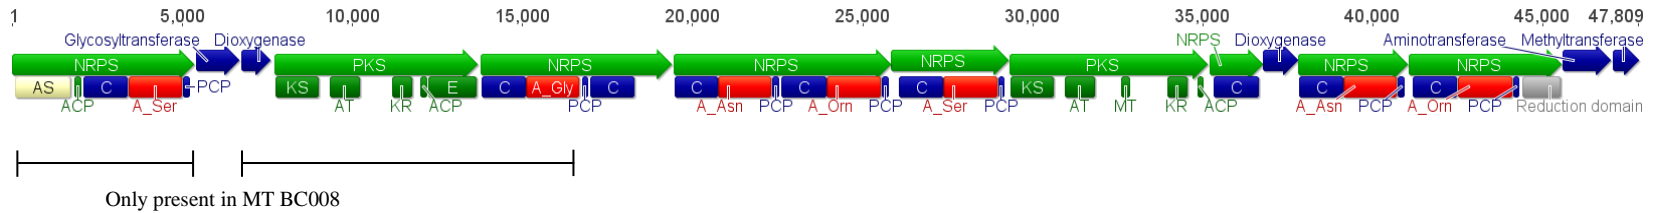

Cluster 9:  
MT BC008

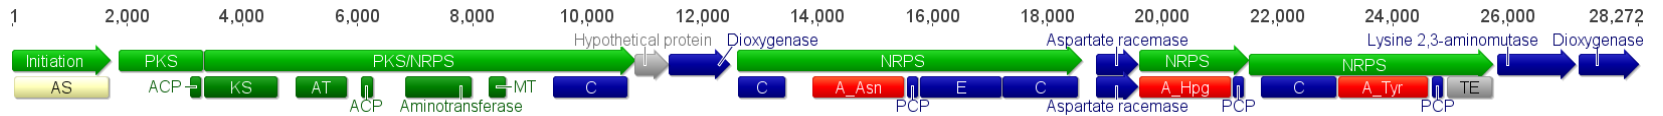

Cluster 10:  
FS PCC 9339

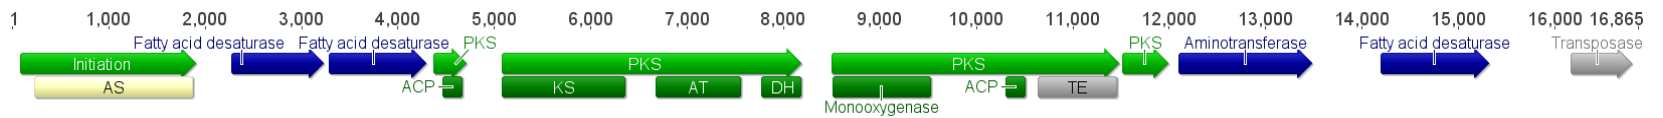

Cluster 11:  
FS PCC 9339

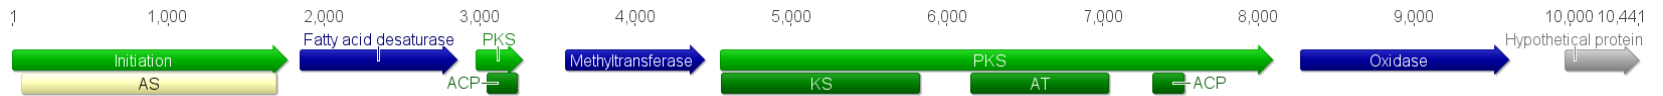

Cluster 12:  
FS PCC 9605

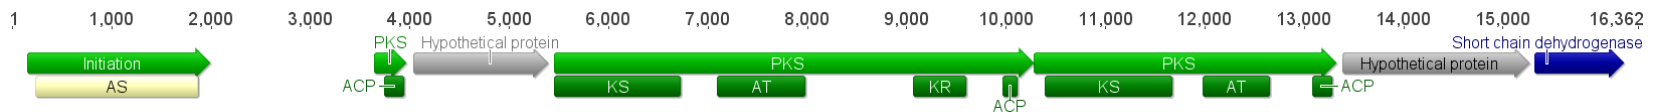

Cluster 13:  
MT BC008

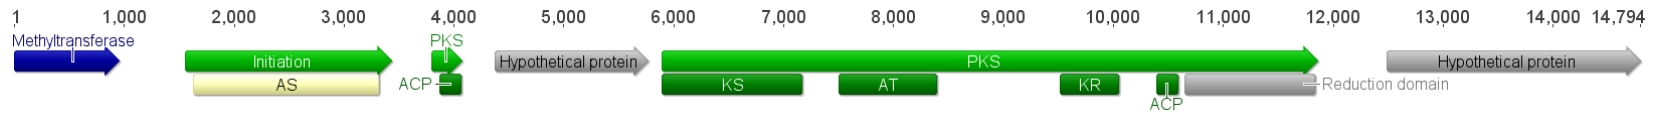

Cluster 14:  
FS PCC 9339

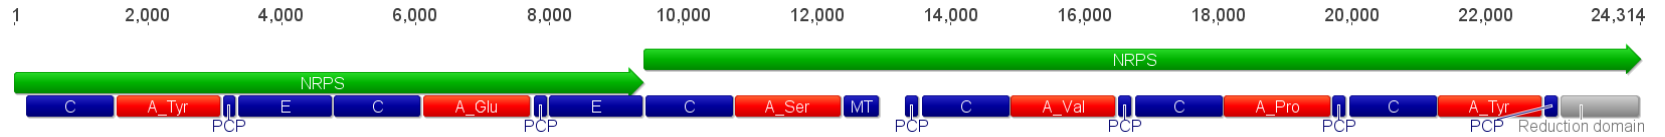

Cluster 15:  
MR PCC 10914

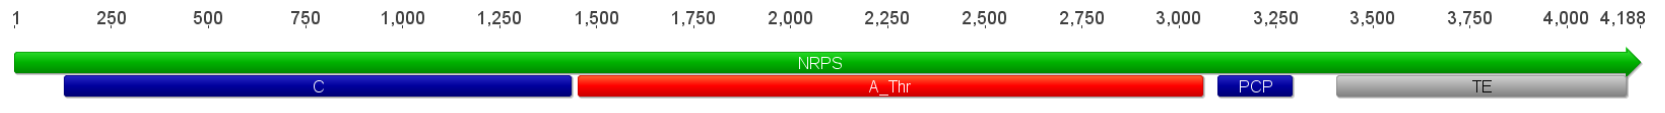

Cluster 16:  
MR PCC 10914

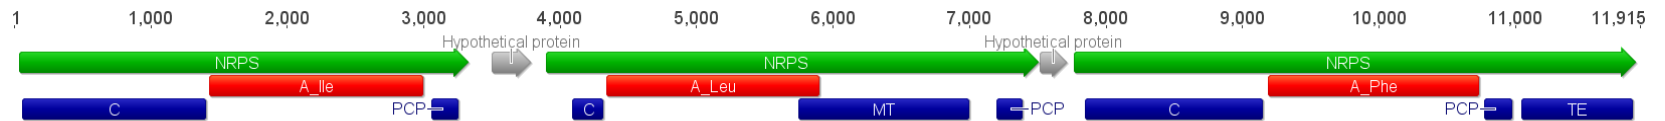

Cluster 17:  
HW IC-52-3,  
FS PCC 9431  
and FM SAG 1427-1

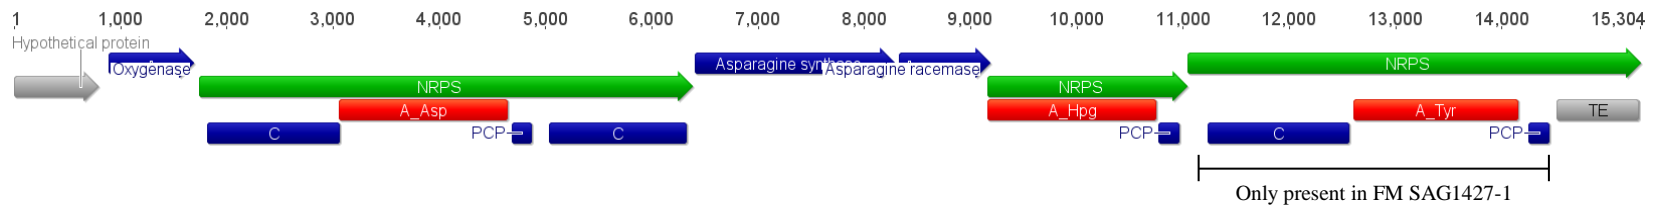

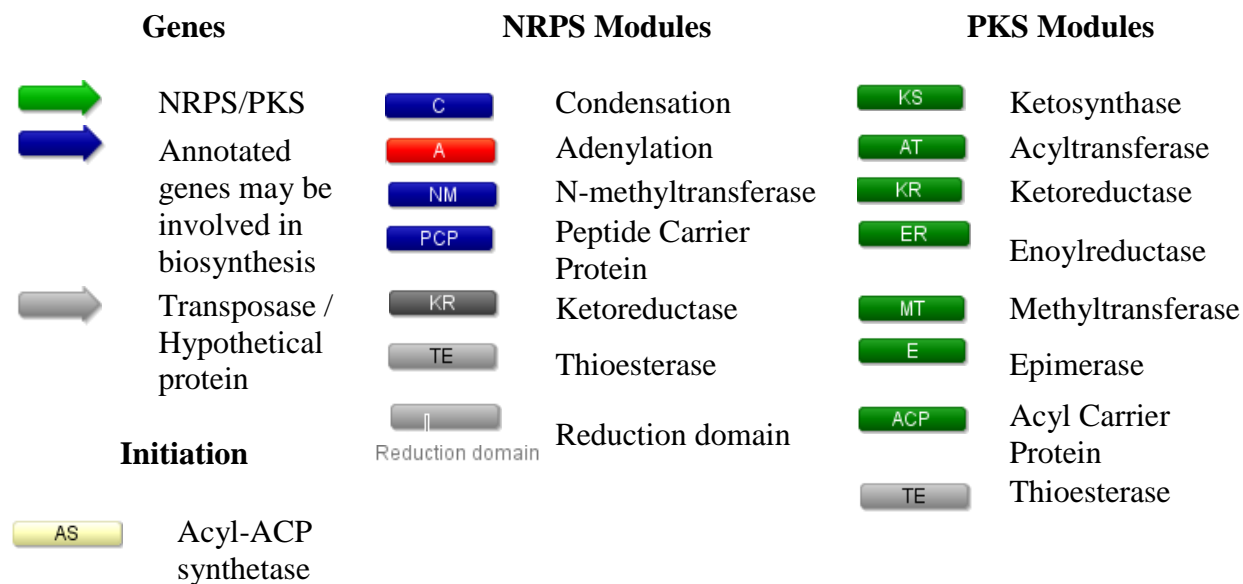

**Additional file 4: Complete orphan NRPS/PKS gene clusters identified from the Subsection V cyanobacterial genomes.** The genomes in which the orphan gene clusters were identified are stated to the left of each cluster (WI HT-29-1: *W. intricata* UH strain HT-29-1, HW IC-52-3: *H. welwitschii* UH strain IC-52-3, FS PCC 9431: *Fischerella* sp. PCC 9431, FS PCC 9399: *Fischerella* sp. PCC 9339, FM SAG 1427-1: *Fischerella muscicola* SAG 1427-1, CF PCC 6912: *Chlorogloeopsis fritschii* PCC 6912, CS PCC 9212: *Chlorogloeopsis* sp. PCC 9212, MT BC008: *Mastigocoleus testarum* BC008, MR PCC 10914: *Mastigocladopsis repens* PCC 10914, FS PCC 9605: *Fischerella* sp. PCC 9605). Fragments of gene clusters, or differences from the gene cluster shown are noted in the image.
